# READ The American Journal of PSYCHIATRY ONLINE

## ONLINE BENEFITS

### AJP in Advance

Receive key research articles posted on the AJP website well in advance of their appearance in print.

### Back Issue Access

Gain access to back issues starting with Volume 1, Issue 1 of the American Journal of Insanity in 1844. (Available to institutions as a separate one-time purchase.)

### AJP CME

Take interactive quizzes that offer AMA PRA Category 1 Credits™ for selected articles from each issue (with paid subscription to the CME Course Program).

### AJP Audio

Listen to MP3-format program summarizing findings from key articles from each issue.

### Residents' Journal

Read additional AJP articles and features that have most value to residents in their training.

### Powerful Searching

Search by author, keyword, and/or citation details—within any one journal, across the entire PsychiatryOnline journal collection, or across all HighWire journals.

### PubMed, CrossRef, and Google Scholar links

Explore everything from cited references to abstracts and full text; to similar articles; to other articles by the same lead authors.

### eTOCs

Get advanced email alerts with the table of contents of the latest issue.

ACTIVATE  
NOW!

IT'S AS EASY AS...

2 Under  
SUBSCRIBE  
NOW, click  
“Activate  
Your Online  
Access”

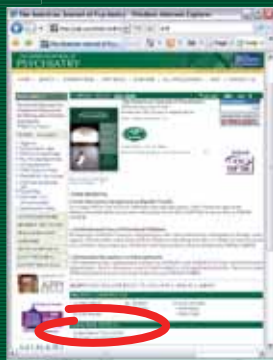

3 Go to [ajp.psychiatryonline.org](http://ajp.psychiatryonline.org)  
Enter your APA Member Number. (This  
can be found on your mailing label.)

AJP 3000056866 CAR-RT LOT88 C-105  
John Q Sample  
Mental Health Professional  
1000 Wilson Blvd STE 1825  
Arlington VA 22209-3924 01654

\*In most cases the number on your label will be your Member Number; if it is not, enter your APA Member Number (with enough leading zeros to create 10 digits).

For more information or if you cannot locate your customer number, please contact APPI Customer Service:

1.800.368.5777  
APPI@PSYCH.ORG

# The Residents' JOURNAL

Last Issue's

## Table of Contents

- 1 Psychiatry, Palliative Care, and *The Residents' Journal*  
Joseph M. Cerimele, M.D.
- 3 The Chlorpromazine Revolution Turns 60  
Michael B. Grody, M.D.
- 5 The Use of Rating Scales in the Diagnosis and Management of Delirium  
Adam Lau, M.D.  
Arusha Farahani, M.D.
- 7 Personality Changes After Deep Brain Stimulation  
Sarah Jane De Asis, M.D.  
Htet Htet Linn, M.D.
- 9 Eradicating Mental Health Stigma  
Ana Thomas Turner, M.D.
- 10 Broca's Blunder  
Shannon Delaney, M.D.
- 11 The Glue: The Importance of Eliciting the Context of a Psychiatric Symptom  
Monifa Seawell, M.D.
- 12 Test Your Knowledge

The Residents' Journal is sent free-of-charge to all psychiatry residents. Anyone interested in being included on the distribution list should contact Angela Moore, the Residents' Journal staff editor at [ajp@psych.org](mailto:ajp@psych.org) with "Subscribe to Residents' Journal" in the subject line.

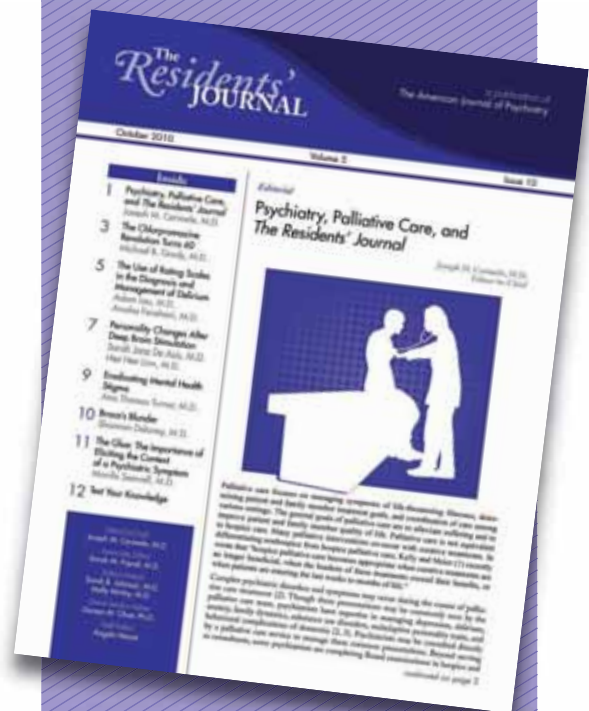

## Upcoming Issue Themes

January: Internal Medicine Skills and Psychiatry  
February: Eating Disorders

a publication of  
The American Journal of Psychiatry

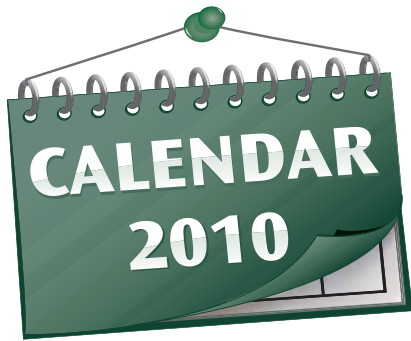

*For free listing of your organization's official annual or regional meeting, please send us the following information: sponsor, location, inclusive dates, type and number of continuing education credits (if available), and the name, address, and telephone number of the person or group to contact for more information. In order for an event to appear in our listing, all notices and changes must be received at least 6 months in advance of the meeting and should be addressed to:*

*Calendar, American Journal of Psychiatry, 1000 Wilson Boulevard, Suite 1825, Arlington, VA 22209-3901, [ajp@psych.org](mailto:ajp@psych.org) (e-mail).*

*Because of space limitations, only listings of meetings of the greatest interest to Journal readers will be included.*

---

## MAY 2011

**May 12–14**, 55th Annual Meeting of the American Academy of Psychoanalysis and Dynamic Psychiatry. Contact: AAPDP Executive Office, P.O. Box 30, Bloomfield, CT 06002; (888) 691-8281 (tel), (860) 286-0787 (fax), [info@aapdp.org](mailto:info@aapdp.org) (e-mail), [www.aapdp.org](http://www.aapdp.org) (web site).

**May 14–19**, 164th Annual Meeting of the American Psychiatric Association, Honolulu, HI. Contact: Cathy Nash, APA Annual Meetings Dept., 1000 Wilson Blvd., Ste. 1825, Arlington, VA 22209; (703) 907-7822.

**May 26–29**, 3rd International Congress on ADHD – From Childhood to Adult Disease, Berlin, Germany. Contact: Congress and Exhibition Office: CPO HANSER SERVICE, 011-49-40-670 88 20 (tel), [www.adhd-congress.org](http://www.adhd-congress.org) (web site), [adhd2011@cpo-hanser.de](mailto:adhd2011@cpo-hanser.de) (e-mail).

---

## OCTOBER

**October 5–8**, II International Congress, Dual Disorders, Addictive Behaviors and other Mental Disorders, Barcelona, Spain. Contact: SEPD, [www.cipd2011.com](http://www.cipd2011.com) (web site).

**October 18–23**, 58th Annual Meeting of the American Academy of Child and Adolescent Psychiatry, Toronto, Ontario. Contact: AACAP, 3615 Wisconsin Avenue, N.W., Washington, DC 20016-3007; (202) 966-7300 (tel), (202) 966-2891 (fax), [meetings@aacap.org](mailto:meetings@aacap.org) (e-mail), [www.aacap.org](http://www.aacap.org) (web site).

**October 27–30**, 63rd Institute on Psychiatric Services, American Psychiatric Association, San Francisco, CA. Contact: Jill Gruber, APA Annual Meetings Dept., 1000 Wilson Blvd., Ste. 1825, Arlington, VA 22209; (703) 907-7815.

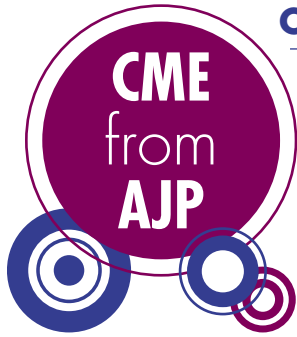

## Continuing Medical Education

Three articles in this issue form the basis of a short course with questions that can be answered for up to 1 *AMA PRA Category 1 Credit™* each by visiting <http://cme.psychiatryonline.org/> and clicking on “American Journal of Psychiatry CME.”

CME credit is issued only online, and a paid subscription to the AJP CME course program is required.

This month’s courses appear on pages 1561–1564.

**FREE AUDIO!**

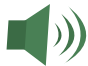

## Have You Heard?

You can listen to highlights of *The American Journal of Psychiatry* by downloading a monthly free .mp3 audio file from our web site (<http://ajp.psychiatryonline.org/misc/audio.dtl>) or by subscribing to the AJP Audio podcast at iTunes or other feed reader (e.g., NewzCrawler, FeedDemon, Bloglines, Google Reader). Presented by Deputy Editor Dr. Susan Schultz or by Editorial Director Michael Roy, each month’s audio lasts approximately 30 minutes and covers several research articles, the Treatment in Psychiatry feature, and one or two editorials.

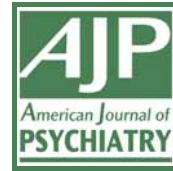

Coming in the January 2011 issue\*

## THE AMERICAN JOURNAL OF PSYCHIATRY

A Quality-Based Review of Randomized Controlled Trials of Psychodynamic Psychotherapy

A.J. Gerber, J.H. Kocsis, B.L. Milrod, S.P. Roose, J.P. Barber, M.E. Thase, P. Perkins, and A.C. Leon

The Structure of Genetic and Environmental Risk Factors for Syndromal and Subsyndromal Common  
DSM-IV Axis I and All Axis II Disorders

K.S. Kendler, S.H. Aggen, G.P. Knudsen, E. Røysamb, M.C. Neale, and T. Reichborn-Kjennerud  
Childhood Trauma and Children’s Emerging Psychotic Symptoms: A Genetically Sensitive Longitudinal Cohort  
Study

L. Arseneault, M. Cannon, H.L. Fisher, G. Polanczyk, T.E. Moffitt, and A. Caspi

Paternal Age at Birth of First Child and Risk of Schizophrenia

L. Petersen, P.B. Mortensen, and C.B. Pedersen

**\*Can’t wait? Visit [ajp.psychiatryonline.org](http://ajp.psychiatryonline.org) and click the “AJP in Advance” logo to see all articles uploaded in advance of print!**

## Contents

- A20 Editorial Board  
A22 Highlights of this issue

## Editorials

- 423 **The 'continuum of psychosis': scientifically unproven and clinically impractical**  
S. M. Lawrie, J. Hall, A. M. McIntosh, D. G. C. Owens and E. C. Johnstone
- 426 **Inequality: an underacknowledged source of mental illness and distress**  
K. E. Pickett and R. G. Wilkinson
- 429 **Providing patients with information about treatment choices: do unto others?**  
M. J. Crawford and E. Dunlea
- 431 **Treatment adherence in psychoses**  
A. S. David

## Review article

- 433 **Combined treatment with cognitive-behavioural therapy in adolescent depression: meta-analysis**  
B. Dubicka, R. Elvins, C. Roberts, G. Chick, P. Wilkinson and I. M. Goodyer

- 440 **The first psychiatric hospital in China – psychiatry in pictures**  
Jie Li

## Papers

- 441 **'What would you do if you were me, doctor?': randomised trial of psychiatrists' personal v. professional perspectives on treatment recommendations**  
R. Mendel, J. Hamann, E. Traut-Mattausch, M. Bühner, W. Kissling and D. Frey

- 447 **Psychosis in the *Firdaus al-Hikmat*, the first major Arabic medical text – extra**  
Neil Aggarwal

- 448 **Treatment adherence therapy in people with psychotic disorders: randomised controlled trial**  
A. B. P. Staring, M. Van der Gaag, G. T. Koopmans, J. P. Selten, J. M. Van Beveren, M. W. Hengeveld, A. J. M. Loonen and C. L. Mulder

- 455 **Delirium – in 100 words**  
David Meagher

- 456 **Cognitive therapy v. usual treatment for borderline personality disorder: prospective 6-year follow-up**  
K. M. Davidson, P. Tyrer, J. Norrie, S. J. Palmer and H. Tyrer

- 463 **Effectiveness of home treatment for elderly people with depression: randomised controlled trial**  
G. Klug, G. Hermann, B. Fuchs-Nieder, M. Panzer, A. Haider-Stipacek, H. G. Zapotoczky and S. Priebe

- 468 **Sociocultural practices in Ethiopia: association with onset and persistence of postnatal common mental disorders**  
C. Hanlon, G. Medhin, A. Alem, M. Araya, A. Abdulahi, M. Tomlinson, M. Hughes, V. Patel, M. Dewey and M. Prince

- 476 **Parental help-seeking in primary care for child and adolescent mental health concerns: qualitative study**  
K. Sayal, V. Tischler, C. Coope, S. Robotham, M. Ashworth, C. Day, A. Tylee and E. Simonoff

- 482 **Neuroanatomical correlates of psychosis in temporal lobe epilepsy: voxel-based morphometry study**  
F. Sundram, M. Cannon, C. P. Doherty, G. J. Barker, M. Fitzsimons, N. Delanty and D. Cotter

- 492 **Hannah: a case of infertility and depression – psychiatry in the Old Testament**  
George Stein

- 493 **Epidemiology and trends in non-fatal self-harm in three centres in England: 2000–2007**  
H. Bergen, K. Hawton, K. Waters, J. Cooper and N. Kapur

## Columns

- 499 Correspondence  
503 Correction  
504 Book reviews  
505 Contents of *Advances in Psychiatric Treatment*  
506 Books received  
507 Contents of the *American Journal of Psychiatry*  
508 From the Editor's desk

## Cover picture

*Me – Smoking* (2008).  
Jonathan Lill (b. 1967)

Jonathan writes: 'Having been admitted to the Bethlem hospital I grabbed the chance at the Bethlem pottery to try figurative sculpture. Over the years since, of admissions, unstable accommodation, occasional spells of formal art education etc., the body of my work is the one thread of progress. I have used it as a way of investigating self-perception, how other see me and how I perceive others. Only by using myself as a model was I able to accept how distorted my view of myself was, and only when my consultant was advised to see my work, was it realised how far from reality I really was. Without that recognition, I wouldn't be alive today.'

'Using myself as a model can involve hours before the mirror. On a break, and trying to think of a confrontationally effeminate pose, I saw myself with cigarette in hand. Smoking is a habit I picked up in my first time in hospital, and which I use to self-medicate to this day'.

Image supplied by the Bethlem Gallery, London ([www.bethlemgallery.com](http://www.bethlemgallery.com)). With thanks to Beth Elliott.

We are always looking for interesting and visually appealing images for the cover of the *Journal* and would welcome suggestions or pictures, which should be sent to Dr Allan Beveridge, British Journal of Psychiatry, 17 Belgrave Square, London SW1X 8PG, UK or [bjp@rcpsych.ac.uk](mailto:bjp@rcpsych.ac.uk).

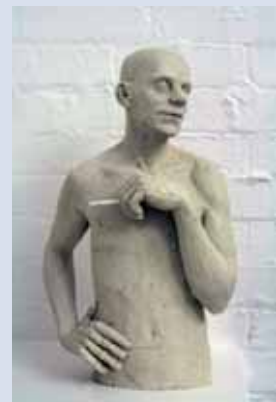

# get CME from AJP

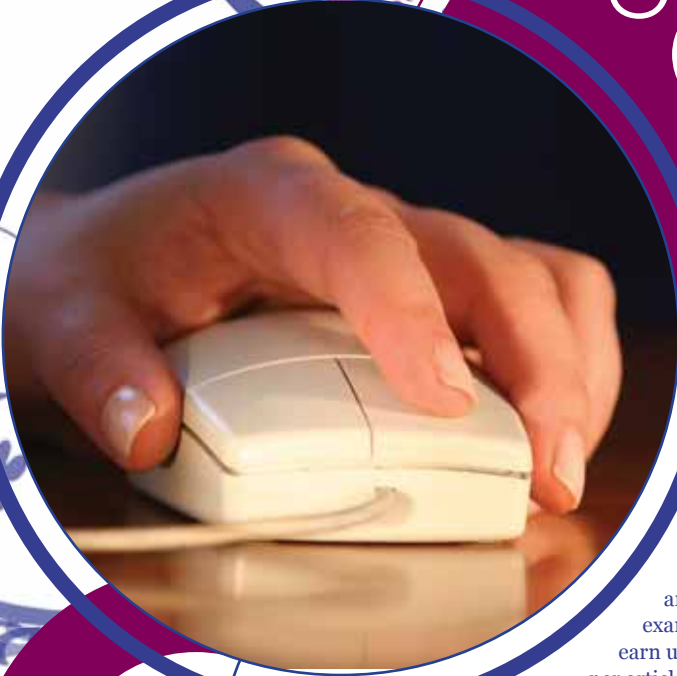

Brief companion exams are created for three of the most influential articles from each issue. By reading the articles and completing the online exams, you can test your knowledge and earn up to 1 *AMA PRA Category 1 Credit™* per article. Correct answers are highlighted for your reference upon completion of the course; there is no minimum threshold score necessary for the credit. A

link from the question to the correct answer in context will also be highlighted in the associated article, thus extending the learning experience.

CME credit is only provided online, and a subscription to the AJP CME program is required. From the moment you subscribe to the AJP CME program, you will be able to select from 72 courses from among 40 possible subject areas. You'll also be able to access the next 33 courses as they become available. For more information and pricing, please go to <http://cme.psychiatryonline.org/misc/aboutajpcme.shtml>

This activity is sponsored by the American Psychiatric Association. The American Psychiatric Association is accredited by the Accreditation Council for Continuing Medical Education to provide continuing medical education for physicians. The American Psychiatric Association designates each educational activity for a maximum of 1 *AMA PRA Category 1 Credit™*. Physicians should only claim credit commensurate with the extent of their participation in the activity.

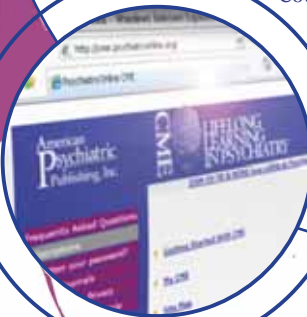

Fulfill your CME requirement while staying current on the latest advances in psychiatry.  
Subscribe to AJP CME!
