# THE AMERICAN JOURNAL OF PSYCHIATRY

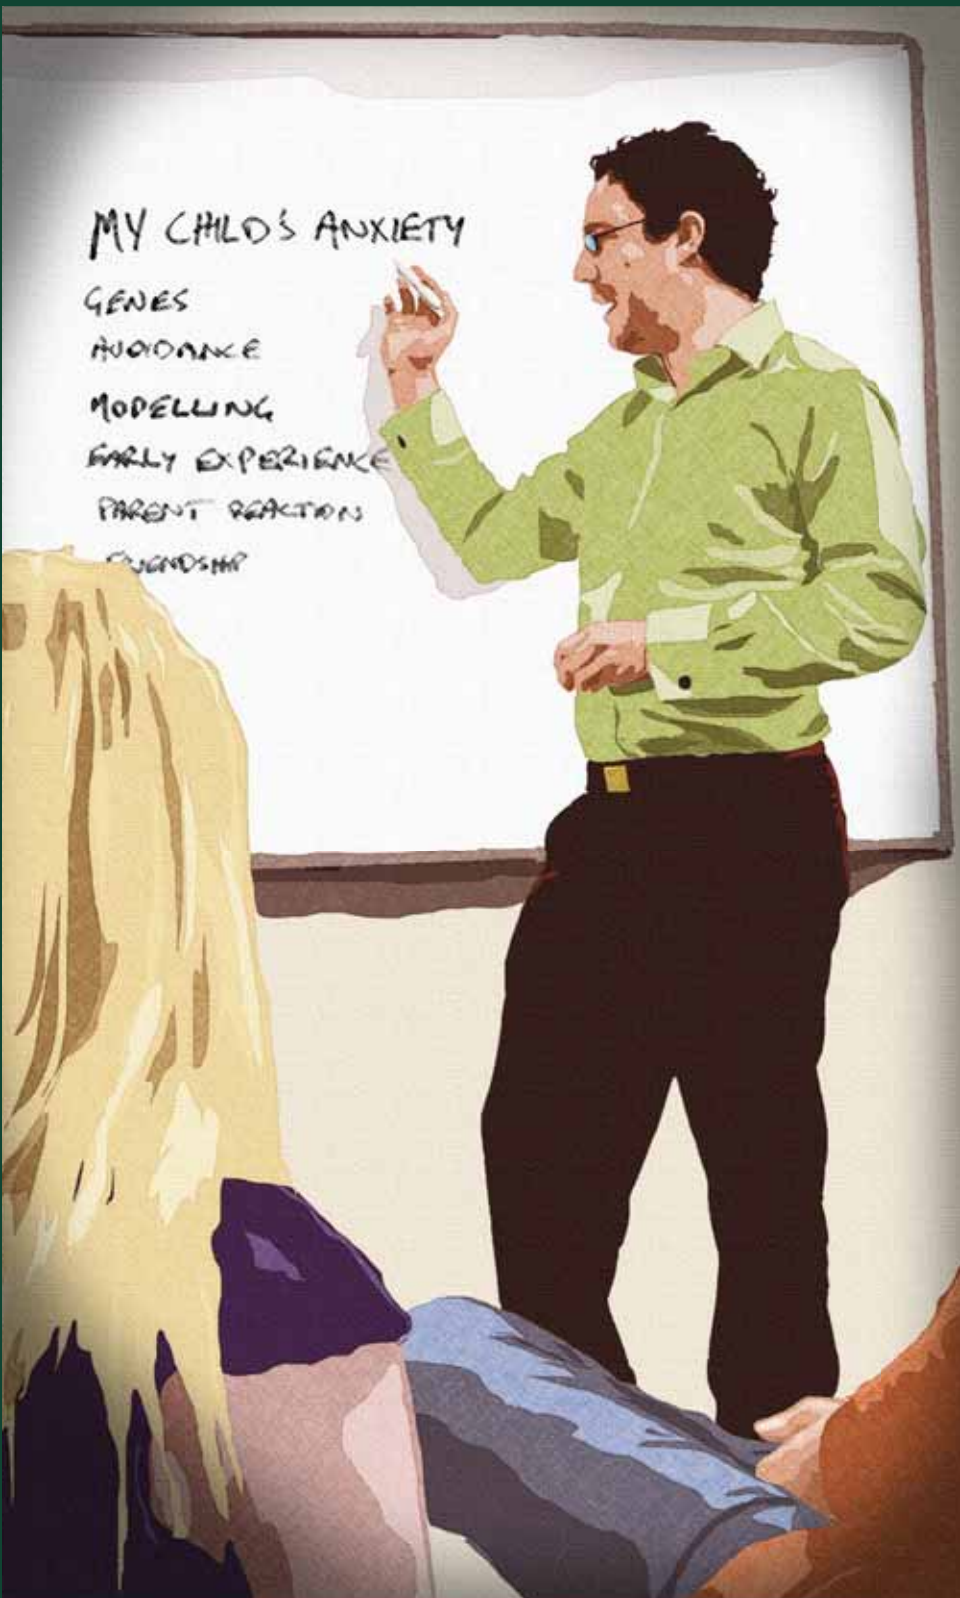

### National Trends in Outpatient Psychotherapy

Mark Olfson, M.D., M.P.H., and Steven C. Marcus, Ph.D.

1456

### Hurtful Words: Association of Exposure to Peer Verbal Abuse With Elevated Psychiatric Symptom Scores and Corpus Callosum Abnormalities

Martin H. Teicher, M.D., Ph.D., et al.

1464

### Genome-Wide Association Study of Suicide Attempts in Mood Disorder Patients

Roy Perlis, M.D., M.Sc., et al.

1499

### ◀ Altering the Trajectory of Anxiety in At-Risk Young Children

Ronald M. Rapee, Ph.D., et al.

1518

### Continuing Medical Education

1561

December 2010

Volume 167 • Number 12

Official Journal of the  
AMERICAN PSYCHIATRIC ASSOCIATION

[ajp.psychiatryonline.org](http://ajp.psychiatryonline.org)
